# Supplementary material for: Association of Posttraumatic Stress Disorder With Accelerated Cognitive Decline in Middle-aged Women
Source: PubMed Central journal article supplement (PMC9247738; doi:10.1001/jamanetworkopen.2022.17698), 2022-06-30
Supplement: jamanetwopen-e2217698-s001.pdf [file jamanetwopen-e2217698-s001.pdf]

## Supplementary Online Content

Roberts AL, Liu J, Lawn RB, et al. Association of posttraumatic stress disorder with accelerated cognitive decline in middle-aged women. *JAMA Netw Open*. 2022;5(6):e2217698. doi:10.1001/jamanetworkopen.2022.17698

**eTable 1.** Distribution of Worst Trauma Type and PTSD Symptoms in Cogstate Sample

**eTable 2.** Characteristics of Responders and Nonresponders to Cogstate Invitation

**eTable 3.** Participant Characteristics by Number of Completed Cognitive Assessments

**eTable 4.** Association Between PTSD and Rate of Change in Cogstate Composite Scores Among Women With at Least 1 Cognitive Assessment After Baseline

**eTable 5.** Association Between PTSD and Rate of Change in Cogstate Composite Scores Adjusted for Depression

**eTable 6.** Association Between PTSD and Rate of Change in Cogstate Composite Scores Adjusted for Practice Effects

**eTable 7.** Association Between PTSD and Rate of Change in Cogstate Composite Scores Using Data Up to the Second, Third, and Fourth Session

**eFigure 1.** Flowchart of Analytic Sample Selection

**eFigure 2.** Conceptual Models of PTSD, Cognitive Decline, Depression, and Covariates

This supplementary material has been provided by the authors to give readers additional information about their work.

**eTable 1.** Distribution of Worst Trauma Type and PTSD Symptoms in Cogstate Sample

|                                                                                                     | No. (%)      |
|-----------------------------------------------------------------------------------------------------|--------------|
| <b>Worst trauma type</b>                                                                            |              |
| Serious accident                                                                                    | 732 (6.0%)   |
| Natural/human-made disaster                                                                         | 409 (3.3%)   |
| Life-threatening illness                                                                            | 802 (6.5%)   |
| Physical punishments/beatings before age 18                                                         | 550 (4.5%)   |
| Other physical attack                                                                               | 645 (5.3%)   |
| Unwanted sexual contact                                                                             | 1357 (11.1%) |
| Miscarriage/Stillbirth                                                                              | 1331 (10.9%) |
| Death of offspring                                                                                  | 341 (2.8%)   |
| Complications of pregnancy/labor                                                                    | 520 (4.2%)   |
| Sexual harassment at work                                                                           | 156 (1.3%)   |
| Serious injury or fear of injury                                                                    | 404 (3.3%)   |
| Death of a close family member or friend                                                            | 1626 (13.3%) |
| Witness of injury/death outside of work                                                             | 515 (4.2%)   |
| War-related casualties                                                                              | 65 (0.5%)    |
| Treating civilians with traumatic injuries                                                          | 446 (3.6%)   |
| Other                                                                                               | 1640 (13.4%) |
| <b>PTSD symptoms</b>                                                                                |              |
| Avoided being reminded of this experience by staying away from certain places, people or activities | 5063 (41.3%) |
| Lost interest in activities that were once important or enjoyable                                   | 3615 (29.5%) |
| Felt more isolated or distant from other people                                                     | 4771 (38.9%) |
| Found it hard to have love or affection for other people                                            | 2720 (22.2%) |
| Felt that there was no point in planning for the future                                             | 1741 (14.2%) |
| Had more trouble than usual falling asleep or staying asleep                                        | 4999 (40.7%) |
| Became jumpy or got easily startled by ordinary noises or movements                                 | 2660 (21.7%) |

**eTable 2.** Characteristics of Responders and Nonresponders to Cogstate Invitation

|                                                                           | <b>Responders</b> | <b>Non-responders</b> | <b>p<sup>e</sup></b> |
|---------------------------------------------------------------------------|-------------------|-----------------------|----------------------|
|                                                                           | (n=15,138)        | (n=28,819)            |                      |
| <b>Age at trauma/PTSD assessment (year), mean (SD)</b>                    | 53.8 (4.6)        | 53.7 (4.6)            | <0.001               |
| <b>Age at worst trauma (year), mean (SD)</b>                              | 29.7 (14.3)       | 30.2 (14.2)           | 0.002                |
| <b>Time between worst trauma and PTSD questionnaire (year), mean (SD)</b> | 24.2 (14.5)       | 23.5 (14.4)           | <0.001               |
| <b>Non-Hispanic White, No. (%)</b>                                        | 14515 (95.9)      | 27346 (94.9)          | <0.001               |
| <b>Parental education, No. (%)</b>                                        |                   |                       | <0.001               |
| High school                                                               | 7703 (50.9)       | 15348 (53.3)          |                      |
| Some college                                                              | 3692 (24.4)       | 6802 (23.6)           |                      |
| College plus                                                              | 3738 (24.7)       | 6661 (23.1)           |                      |
| <b>Participant education, No. (%)</b>                                     |                   |                       | <0.001               |
| Associate's                                                               | 2881 (19.0)       | 4679 (16.2)           |                      |
| Bachelor's                                                                | 7058 (46.6)       | 15016 (52.1)          |                      |
| Master's                                                                  | 4601 (30.4)       | 8374 (29.1)           |                      |
| Doctorate                                                                 | 593 (3.9)         | 742 (2.6)             |                      |
| <b>Body mass index (kg/m<sup>2</sup>), mean (SD)</b>                      | 27.4 (6.3)        | 27.4 (6.2)            | 0.39                 |
| <b>Smoking status, No. (%)</b>                                            |                   |                       | <0.001               |
| Never                                                                     | 9964 (65.8)       | 19046 (66.1)          |                      |
| Past                                                                      | 4673 (30.9)       | 8529 (29.6)           |                      |
| Current                                                                   | 496 (3.3)         | 1236 (4.3)            |                      |
| <b>Alcohol intake, No. (%)</b>                                            |                   |                       | <0.001               |
| None                                                                      | 6259 (41.4)       | 13349 (46.3)          |                      |
| 0-20 grams/day                                                            | 7755 (51.2)       | 13635 (47.3)          |                      |
| 20+ grams/day                                                             | 1119 (7.4)        | 1827 (6.3)            |                      |
| <b>Physical activity (MET-hrs/wk), mean (SD)</b>                          | 30 (31.2)         | 28.9 (31.2)           | <0.001               |
| <b>Diet quality (AHEI)<sup>a</sup>, mean (SD)</b>                         | 60.1 (11.7)       | 59.6 (11.1)           | <0.001               |

|                                                           | <b>Responders</b> | <b>Non-responders</b> | <b>p<sup>e</sup></b> |
|-----------------------------------------------------------|-------------------|-----------------------|----------------------|
|                                                           | (n=15,138)        | (n=28,819)            |                      |
| <b>Depressive symptoms (CES-D)<sup>b</sup>, mean (SD)</b> | 5.8 (4.8)         | 6.0 (5.0)             | <0.001               |
| <b>Diagnosed depression<sup>c</sup>, No. (%)</b>          | 4382 (29.0)       | 8125 (28.2)           | 0.10                 |
| <b>Trauma/PTSD, No. (%)</b>                               |                   |                       | <0.001               |
| No trauma                                                 | 2748 (18.2)       | 5589 (19.4)           |                      |
| Trauma no PTSD symptoms                                   | 4097 (27.1)       | 7871 (27.3)           |                      |
| Trauma 1-3 PTSD symptoms                                  | 5104 (33.7)       | 9116 (31.6)           |                      |
| Trauma 4-5 PTSD symptoms                                  | 2127 (14.1)       | 3958 (13.7)           |                      |
| Trauma 6-7 PTSD symptoms                                  | 1057 (7.0)        | 2277 (7.9)            |                      |
| <b>Hypertension<sup>d</sup>, No. (%)</b>                  | 5750 (38.0)       | 11426 (39.7)          | <0.001               |
| <b>Diabetes<sup>d</sup>, No. (%)</b>                      | 1093 (7.2)        | 2543 (8.8)            | <0.001               |
| <b>Myocardial infarction<sup>d</sup>, No. (%)</b>         | 191 (1.3)         | 415 (1.4)             | 0.13                 |
| <b>Stroke<sup>d</sup>, No. (%)</b>                        | 190 (1.3)         | 465 (1.6)             | 0.003                |

Values are means (SD) for continuous variables or No. (%) for categorical variables. MET = metabolic equivalent of task.

<sup>a</sup> Alternate Healthy Eating Index (AHEI) without alcohol consumption was used in the analysis; higher scores reflect better diet quality (possible range=0–100).

<sup>b</sup> Center for Epidemiologic Studies Depression (CES-D) scale, short form (possible range=0–30).

<sup>c</sup> History of clinician-diagnosed depression reported at the 2003-2013 questionnaires.

<sup>d</sup> History of clinician-diagnosed health conditions reported at the 1989-2013 questionnaires.

<sup>e</sup> P values were obtained from two-sample t test for continuous characteristics and Chi-squared test for categorical characteristics.

**eTable 3.** Participant Characteristics by Number of Completed Cognitive Assessments

|                                                                           | Number of Assessments |             |             |             |             | <i>p</i> <sup>e</sup> |
|---------------------------------------------------------------------------|-----------------------|-------------|-------------|-------------|-------------|-----------------------|
|                                                                           | 1                     | 2           | 3           | 4           | 5           |                       |
|                                                                           | (n=4,333)             | (n=3,727)   | (n=2,557)   | (n=1,028)   | (n=625)     |                       |
| <b>Age at baseline (year), mean (SD)</b>                                  | 60.8 (4.5)            | 61.1 (4.5)  | 61.2 (4.5)  | 61.3 (4.7)  | 61.4 (4.6)  | <0.001                |
| <b>Age at worst trauma (year), mean (SD)</b>                              | 29.6 (14.1)           | 29.4 (14.3) | 30.3 (14.3) | 29.8 (14.9) | 29.4 (14.9) | 0.16                  |
| <b>Time between worst trauma and PTSD questionnaire (year), mean (SD)</b> | 23.9 (14.3)           | 24.5 (14.6) | 23.8 (14.5) | 24.3 (14.8) | 25.1 (15)   | 0.14                  |
| <b>Non-Hispanic White, No. (%)</b>                                        | 4142 (95.6)           | 3567 (95.7) | 2457 (96.1) | 996 (96.9)  | 605 (96.8)  | 0.24                  |
| <b>Parental education, No. (%)</b>                                        |                       |             |             |             |             | 0.34                  |
| High school                                                               | 2133 (49.2)           | 1889 (50.7) | 1335 (52.2) | 531 (51.7)  | 324 (51.8)  |                       |
| Some college                                                              | 1106 (25.5)           | 908 (24.4)  | 629 (24.6)  | 250 (24.3)  | 142 (22.7)  |                       |
| College plus                                                              | 1094 (25.2)           | 930 (25.0)  | 593 (23.2)  | 247 (24.0)  | 159 (25.4)  |                       |
| <b>Participant education, No. (%)</b>                                     |                       |             |             |             |             | <0.001                |
| Associate's                                                               | 706 (16.3)            | 721 (19.3)  | 517 (20.2)  | 220 (21.4)  | 138 (22.1)  |                       |
| Bachelor's                                                                | 2058 (47.5)           | 1693 (45.4) | 1169 (45.7) | 463 (45.0)  | 273 (43.7)  |                       |
| Master's                                                                  | 1406 (32.4)           | 1156 (31.0) | 756 (29.6)  | 305 (29.7)  | 189 (30.2)  |                       |
| Doctorate                                                                 | 163 (3.8)             | 157 (4.2)   | 115 (4.5)   | 40 (3.9)    | 25 (4.0)    |                       |
| <b>Body mass index (kg/m<sup>2</sup>), mean (SD)</b>                      | 27.6 (6.2)            | 27.4 (6.3)  | 27.2 (6.2)  | 27.7 (6.8)  | 27.0 (6.1)  | 0.04                  |
| <b>Smoking status, No. (%)</b>                                            |                       |             |             |             |             | 0.60                  |

| Number of Assessments                                     |             |             |             |             |             |                |
|-----------------------------------------------------------|-------------|-------------|-------------|-------------|-------------|----------------|
|                                                           | 1           | 2           | 3           | 4           | 5           | p <sup>e</sup> |
|                                                           | (n=4,333)   | (n=3,727)   | (n=2,557)   | (n=1,028)   | (n=625)     |                |
| Never                                                     | 2829 (65.3) | 2422 (65.0) | 1653 (64.6) | 690 (67.1)  | 400 (64.0)  |                |
| Past                                                      | 1344 (31.0) | 1180 (31.7) | 823 (32.2)  | 311 (30.3)  | 207 (33.1)  |                |
| Current                                                   | 160 (3.7)   | 125 (3.4)   | 81 (3.2)    | 27 (2.6)    | 18 (2.9)    |                |
| <b>Alcohol intake, No. (%)</b>                            |             |             |             |             |             | 0.34           |
| None                                                      | 1851 (42.7) | 1515 (40.6) | 1049 (41.0) | 452 (44.0)  | 276 (44.2)  |                |
| 0-20 grams/day                                            | 2163 (49.9) | 1946 (52.2) | 1309 (51.2) | 507 (49.3)  | 304 (48.6)  |                |
| 20+ grams/day                                             | 319 (7.4)   | 266 (7.1)   | 199 (7.8)   | 69 (6.7)    | 45 (7.2)    |                |
| <b>Physical activity (MET-hrs/wk), mean (SD)</b>          | 30.2 (32.2) | 29.9 (30.3) | 30 (31.4)   | 29.3 (28.1) | 30.8 (28.6) | 0.89           |
| <b>Diet quality (AHEI)<sup>a</sup>, mean (SD)</b>         | 60.2 (11.7) | 60.3 (11.7) | 60.1 (11.5) | 60.0 (11.6) | 60.4 (12.3) | 0.90           |
| <b>Depressive symptoms (CES-D)<sup>b</sup>, mean (SD)</b> | 6.1 (5)     | 6.1 (5)     | 5.9 (4.9)   | 6.1 (5)     | 5.9 (4.8)   | 0.77           |
| <b>Diagnosed depression<sup>c</sup>, %(n)</b>             | 1371 (31.6) | 1142 (30.6) | 774 (30.3)  | 331 (32.2)  | 176 (28.2)  | 0.32           |
| <b>PTSD status, %(n)</b>                                  |             |             |             |             |             | 0.29           |
| No PTSD                                                   | 1429 (33.0) | 1284 (34.5) | 835 (32.7)  | 330 (32.1)  | 174 (27.8)  |                |
| 1-3 PTSD sx                                               | 1774 (40.9) | 1499 (40.2) | 1073 (42.0) | 439 (42.7)  | 273 (43.7)  |                |
| 4-5 PTSD sx                                               | 751 (17.3)  | 623 (16.7)  | 443 (17.3)  | 174 (16.9)  | 117 (18.7)  |                |
| 6-7 PTSD sx                                               | 379 (8.7)   | 321 (8.6)   | 206 (8.1)   | 85 (8.3)    | 61 (9.8)    |                |
| <b>Hypertension<sup>d</sup>, No. (%)</b>                  | 1718 (39.6) | 1419 (38.1) | 937 (36.6)  | 416 (40.5)  | 228 (36.5)  | 0.06           |
| <b>Diabetes<sup>d</sup>, No. (%)</b>                      | 355 (8.2)   | 273 (7.3)   | 178 (7.0)   | 73 (7.1)    | 40 (6.4)    | 0.23           |

|                                                                    | Number of Assessments |              |             |             |              | <i>p</i> <sup>e</sup> |
|--------------------------------------------------------------------|-----------------------|--------------|-------------|-------------|--------------|-----------------------|
|                                                                    | 1                     | 2            | 3           | 4           | 5            |                       |
|                                                                    | (n=4,333)             | (n=3,727)    | (n=2,557)   | (n=1,028)   | (n=625)      |                       |
| <b>Myocardial infarction<sup>d</sup>, No. (%)</b>                  | 48 (1.1)              | 53 (1.4)     | 53 (2.1)    | 13 (1.3)    | 8 (1.3)      | 0.03                  |
| <b>Stroke<sup>d</sup>, No. (%)</b>                                 | 67 (1.5)              | 40 (1.1)     | 37 (1.4)    | 15 (1.5)    | 10 (1.6)     | 0.43                  |
| <b>Baseline psychomotor speed/attention<sup>f</sup>, mean (SD)</b> | -0.02 (0.94)          | -0.01 (0.91) | 0.02 (0.88) | 0.01 (0.90) | -0.02 (0.95) | 0.59                  |
| <b>Baseline learning/working memory<sup>f</sup>, mean (SD)</b>     | -0.06 (0.75)          | -0.00 (0.73) | 0.03 (0.72) | 0.02 (0.69) | 0.08 (0.71)  | <0.001                |

Values are means (SD) for continuous variables or No. (%) for categorical variables. MET = metabolic equivalent of task. sx =symptoms.

<sup>a</sup> Alternate Healthy Eating Index (AHEI) without alcohol consumption was used in the analysis; higher scores reflect better diet quality (possible range=0–100).

<sup>b</sup> Center for Epidemiologic Studies Depression (CES-D) scale, short form (possible range=0–30).

<sup>c</sup> History of clinician-diagnosed depression reported at the 2003-2013 questionnaires.

<sup>d</sup> History of clinician-diagnosed health conditions reported at the 1989-2013 questionnaires.

<sup>e</sup> *P* values were obtained from F test for continuous characteristics and Chi-squared test for categorical characteristics.

<sup>f</sup> Standardized z scores with higher values indicating better cognitive function.

**eTable 4.** Association Between PTSD and Rate of Change in Cogstate Composite Scores Among Women With at Least 1 Cognitive Assessment After Baseline

|                                              | No. (%)      | Model-1                        |          | Model-2                        |          |
|----------------------------------------------|--------------|--------------------------------|----------|--------------------------------|----------|
|                                              |              | <i>b</i> (95% CI) <sup>a</sup> | <i>p</i> | <i>b</i> (95% CI) <sup>a</sup> | <i>p</i> |
| <b>Psychomotor Speed/Attention (n=7,895)</b> |              |                                |          |                                |          |
| No PTSD symptoms                             | 2,608 (33.0) | Ref                            | Ref      | Ref                            | Ref      |
| 1-3 PTSD symptoms                            | 3,266 (41.4) | -0.024 (-0.049, 0.002)         | 0.07     | -0.024 (-0.050, 0.002)         | 0.07     |
| 4-5 PTSD symptoms                            | 1,350 (17.1) | 0.013 (-0.020, 0.046)          | 0.44     | 0.013 (-0.020, 0.046)          | 0.44     |
| 6-7 PTSD symptoms                            | 671 (8.5)    | -0.054 (-0.095, -0.013)        | 0.01     | -0.054 (-0.095, -0.013)        | 0.01     |
| <b>Learning/Working Memory (n=7,932)</b>     |              |                                |          |                                |          |
| No PTSD symptoms                             | 2,608 (33.0) | Ref                            | Ref      | Ref                            | Ref      |
| 1-3 PTSD symptoms                            | 3,266 (41.4) | -0.007 (-0.030, 0.016)         | 0.55     | -0.007 (-0.030, 0.016)         | 0.54     |
| 4-5 PTSD symptoms                            | 1,350 (17.1) | -0.026 (-0.056, 0.003)         | 0.08     | -0.026 (-0.056, 0.003)         | 0.08     |
| 6-7 PTSD symptoms                            | 671 (8.5)    | -0.081 (-0.118, -0.044)        | <0.001   | -0.082 (-0.119, -0.045)        | <0.001   |

<sup>a</sup> Beta coefficients of the time x PTSD interaction terms from the linear mixed effect models are shown, representing the difference in one-year change in Cogstate composite scores compared to women with no PTSD symptoms.

Model 1: age at baseline cognitive assessment, race/ethnicity, parental education, participant education

Model 2: Model 1 + body mass index, smoking status, alcohol use, physical activity, diet quality.



**eTable 5.** Association Between PTSD and Rate of Change in Cogstate Composite Scores Adjusted for Depression

|                                               | No. (%)      | Model-1                        |          | Model-2                        |          |
|-----------------------------------------------|--------------|--------------------------------|----------|--------------------------------|----------|
|                                               |              | <i>b</i> (95% CI) <sup>a</sup> | <i>p</i> | <i>b</i> (95% CI) <sup>a</sup> | <i>p</i> |
| <b>Psychomotor Speed/Attention (n=12,248)</b> |              |                                |          |                                |          |
| No PTSD symptoms                              | 4,044 (33.0) | Ref                            | Ref      | Ref                            | Ref      |
| 1-3 PTSD symptoms                             | 5,052 (41.3) | -0.015 (-0.040, 0.011)         | 0.25     | -0.015 (-0.040, 0.011)         | 0.25     |
| 4-5 PTSD symptoms                             | 2,102 (17.2) | 0.020 (-0.013, 0.054)          | 0.23     | 0.020 (-0.013, 0.054)          | 0.24     |
| 6-7 PTSD symptoms                             | 1,050 (8.6)  | -0.037 (-0.080, 0.006)         | 0.09     | -0.037 (-0.080, 0.006)         | 0.09     |
| <b>Learning/Working Memory (n=12,263)</b>     |              |                                |          |                                |          |
| No PTSD symptoms                              | 4,050 (33.0) | Ref                            | Ref      | Ref                            | Ref      |
| 1-3 PTSD symptoms                             | 5,054 (41.2) | -0.010 (-0.033, 0.012)         | 0.37     | -0.010 (-0.033, 0.013)         | 0.38     |
| 4-5 PTSD symptoms                             | 2,107 (17.2) | -0.028 (-0.058, 0.002)         | 0.07     | -0.028 (-0.058, 0.002)         | 0.07     |
| 6-7 PTSD symptoms                             | 1,052 (8.6)  | -0.072 (-0.110, -0.033)        | <0.001   | -0.072 (-0.11, -0.033)         | <0.001   |

<sup>a</sup> Beta coefficients of the time x PTSD interaction terms from the linear mixed effect models are shown, representing the difference in one-year change in Cogstate composite scores compared to women with no PTSD symptoms.

Model 1: age at baseline cognitive assessment, race/ethnicity, parental education, participant education, CES-D score and its interaction with time, history of clinician-diagnosed depression and its interaction with time.

Model 2: Model 1 + body mass index, smoking status, alcohol use, physical activity, diet quality.

**eTable 6.** Association Between PTSD and Rate of Change in Cogstate Composite Scores Adjusted for Practice Effects

|                                               | No. (%)      | Model-1                        |          | Model-2                        |          |
|-----------------------------------------------|--------------|--------------------------------|----------|--------------------------------|----------|
|                                               |              | <i>b</i> (95% CI) <sup>a</sup> | <i>p</i> | <i>b</i> (95% CI) <sup>a</sup> | <i>p</i> |
| <b>Psychomotor Speed/Attention (n=12,248)</b> |              |                                |          |                                |          |
| No PTSD symptoms                              | 4,044 (33.0) | Ref                            | Ref      | Ref                            | Ref      |
| 1-3 PTSD symptoms                             | 5,052 (41.3) | -0.012 (-0.038, 0.013)         | 0.33     | -0.013 (-0.038, 0.013)         | 0.33     |
| 4-5 PTSD symptoms                             | 2,102 (17.2) | 0.018 (-0.014, 0.050)          | 0.28     | 0.018 (-0.014, 0.050)          | 0.28     |
| 6-7 PTSD symptoms                             | 1,050 (8.6)  | -0.037 (-0.078, 0.003)         | 0.07     | -0.038 (-0.078, 0.003)         | 0.07     |
| <b>Learning/Working Memory (n=12,263)</b>     |              |                                |          |                                |          |
| No PTSD symptoms                              | 4,050 (33.0) | Ref                            | Ref      | Ref                            | Ref      |
| 1-3 PTSD symptoms                             | 5,054 (41.2) | -0.010 (-0.032, 0.013)         | 0.39     | -0.010 (-0.032, 0.013)         | 0.40     |
| 4-5 PTSD symptoms                             | 2,107 (17.2) | -0.030 (-0.058, -0.002)        | 0.04     | -0.030 (-0.058, -0.001)        | 0.04     |
| 6-7 PTSD symptoms                             | 1,052 (8.6)  | -0.066 (-0.102, -0.030)        | <0.001   | -0.066 (-0.102, -0.031)        | <0.001   |

<sup>a</sup> Beta coefficients of the time x PTSD interaction terms from the linear mixed effect models are shown, representing the difference in one-year change in Cogstate composite scores compared to women with no PTSD symptoms. Practice effects were captured by a categorical variable indicating number of prior tests.

For women with no PTSD symptoms, the estimated rate of decline was -0.065 (95%CI: -0.106 to -0.025) standard deviation (SD)/year in psychomotor speed/attention, and -0.072 (95%CI: -0.108 to -0.035) SD/year in learning/working memory, adjusted for demographic factors and number of prior tests.

Model 1: age at baseline cognitive assessment, race/ethnicity, parental education, participant education, number of prior tests

Model 2: Model 1 + body mass index, smoking status, alcohol use, physical activity, diet quality

**eTable 7.** Association Between PTSD and Rate of Change in Cogstate Composite Scores Using Data Up to the Second, Third, and Fourth Session

|                                               | Up to the 2 <sup>nd</sup> session |          | Up to the 3 <sup>rd</sup> session |          | Up to the 4 <sup>th</sup> session |          |
|-----------------------------------------------|-----------------------------------|----------|-----------------------------------|----------|-----------------------------------|----------|
|                                               | <i>b</i> (95% CI) <sup>a</sup>    | <i>p</i> | <i>b</i> (95% CI) <sup>a</sup>    | <i>p</i> | <i>b</i> (95% CI) <sup>a</sup>    | <i>p</i> |
| <b>Psychomotor Speed/Attention (n=12,248)</b> |                                   |          |                                   |          |                                   |          |
| No PTSD symptoms                              | Ref                               | Ref      | Ref                               | Ref      | Ref                               | Ref      |
| 1-3 PTSD symptoms                             | -0.041 (-0.085, 0.003)            | 0.07     | -0.012 (-0.041, 0.017)            | 0.42     | -0.015 (-0.042, 0.011)            | 0.25     |
| 4-5 PTSD symptoms                             | -0.010 (-0.066, 0.047)            | 0.73     | 0.021 (-0.016, 0.058)             | 0.26     | 0.015 (-0.018, 0.049)             | 0.37     |
| 6-7 PTSD symptoms                             | -0.079 (-0.149, -0.008)           | 0.03     | -0.028 (-0.074, 0.019)            | 0.24     | -0.036 (-0.078, 0.006)            | 0.10     |
| <b>Learning/Working Memory (n=12,263)</b>     |                                   |          |                                   |          |                                   |          |
| No PTSD symptoms                              | Ref                               | Ref      | Ref                               | Ref      | Ref                               | Ref      |
| 1-3 PTSD symptoms                             | -0.016 (-0.056, 0.023)            | 0.41     | -0.022 (-0.049, 0.005)            | 0.10     | -0.016 (-0.040, 0.008)            | 0.19     |
| 4-5 PTSD symptoms                             | -0.045 (-0.095, 0.005)            | 0.08     | -0.041 (-0.075, -0.007)           | 0.02     | -0.040 (-0.070, -0.009)           | 0.01     |
| 6-7 PTSD symptoms                             | -0.103 (-0.165, -0.041)           | 0.001    | -0.071 (-0.113, -0.028)           | 0.001    | -0.078 (-0.116, -0.040)           | <0.001   |

<sup>a</sup> Beta coefficients of the time x PTSD interaction terms from the linear mixed effect models are shown, representing the difference in one-year change in Cogstate composite scores compared to women with no PTSD symptoms.

Models were adjusted for age at baseline cognitive assessment, race/ethnicity, parental education, participant education.

Sample sizes for Cogstate composite scores by PTSD status were the same as in Table 2.

**eFigure 1.** Flowchart of Analytic Sample Selection

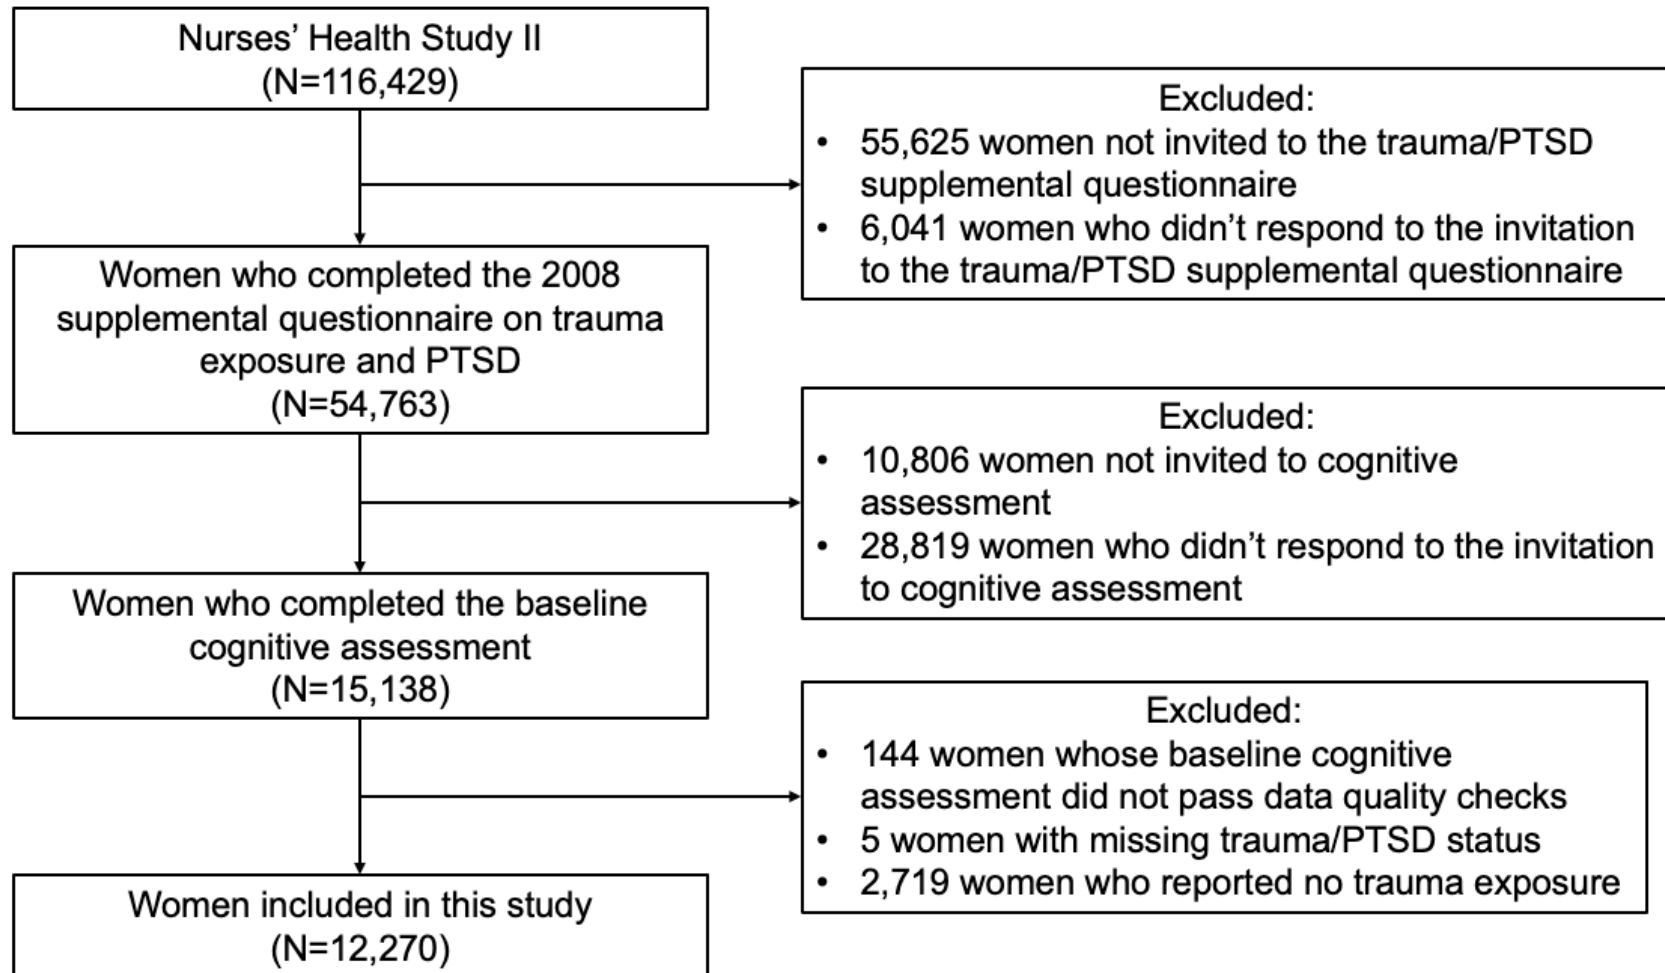

**eFigure 2.** Conceptual Models of PTSD, Cognitive Decline, Depression, and Covariates

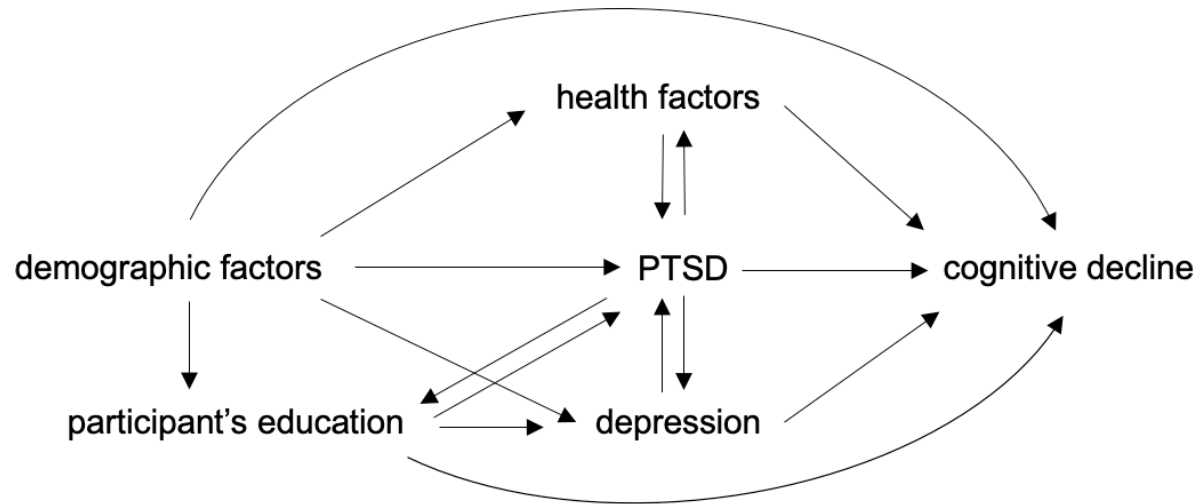

Demographic factors include age, race, parental education. Health factors include body mass index, physical activity, cigarette smoking, alcohol consumption, diet quality, type 2 diabetes, stroke, and myocardial infarction.
